# Supplementary material for: Single-nucleus CUT&RUN elucidates the function of intrinsic and genomics-driven epigenetic heterogeneity in head and neck cancer progression
Source: Genome Res. 2025 Jan;35(1):162–77. doi: 10.1101/gr.279105.124 (PMC11789629; doi:10.1101/gr.279105.124)
Supplement: Supplement 1 [file Supplemental_Table_S1.xlsx]

## Sheet: ChromHMM_Transitions
Supplemental Table 1. The number of 200bp genomic bins representing genomic regions that either remained devoid of H3K4me3, H3K27ac and H3K27me3 during HNSCC progression (E4-E4), or genomic regions that did not fall into this category.
Source	Target	#No_E4 - > E4_bins	#No of other state transitions	Total 200bp bins	Proportion E4-E4 bins
HN120Pri	HN120Met	13433455	941541	1437996	0.9345
HN120Pri	HN120PCR	13653800	721196	1437996	0.95
HN137Pri	HN137Met	13888524	486472	1437996	0.9662
HN137Pri	HN137PCR	13879263	495733	1437996	0.9655
				AVERAGE:	0.954
